# Supplementary material
Source: publisher site journal article supplement (https://www.dovepress.com/article/473492)
Supplement: Supplementary file 1 [file get_supplementary_file.php]

SUPPLEMENTARY MATERIAL

Seo et al

**Impact of Demographics and Insurance Coverage on Schizophrenia Treatment and Healthcare Resource Utilization Within an Integrated Healthcare System**

Table of Contents

[Supplemental Figure 1. Patient attrition. 2](#_Toc174636110)

[Supplemental Table 1. Multivariable logistic regression analyses 3](#_Toc174636111)

# Supplemental Figure 1. Patient attrition.


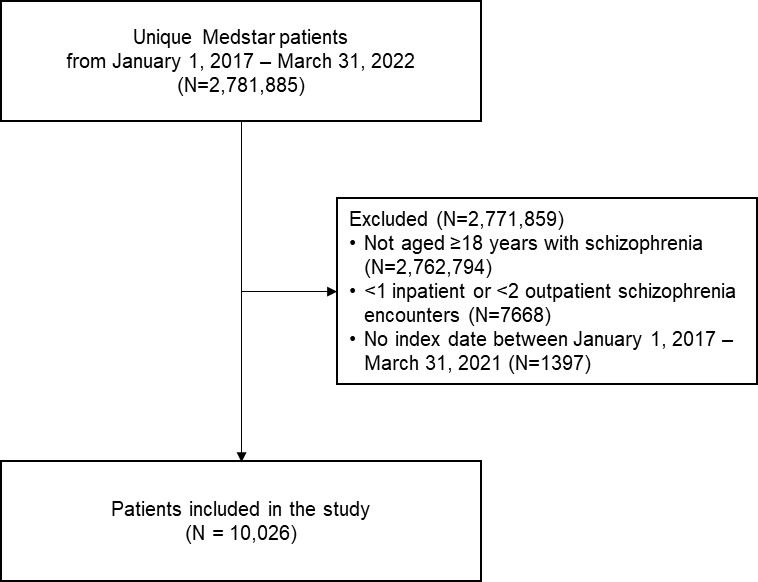


| Supplemental Table 1. Multivariable logistic regression analyses | | | | | | |
| --- | --- | --- | --- | --- | --- | --- |
| **Parameter** | **Model A (Insurance type only)** | | **Model B (Insurance type & age)** | | **Model C (Insurance type, age & race/ethnicity)** | |
| **OR (95% CI)** | ***P* value** | **ORa (95% CI)** | ***P*value** | **ORa (95% CI)** | ***P*value** |
| Second-generation antipsychotic |  |  |  |  |  |  |
| Medicare vs Medicaid | 0.80 (0.73–0.88) | <.001 | 0.88 (0.79–0.97) | .012 | 0.87 (0.79–0.96) | .008 |
| Other vs Medicaid | 0.92 (0.80–1.05) | NS | 0.89 (0.78–1.02) | NS | 0.87 (0.76–1.00) | NS |
| Inpatient visits |  |  |  |  |  |  |
| Medicare vs Medicaid | 0.69 (0.63–0.75) | <.001 | 0.74 (0.68–0.82) | <.001 | 0.75 (0.68–0.82) | <.001 |
| Other vs Medicaid | 0.83 (0.73–0.94) | .005 | 0.78 (0.69–0.89) | <.001 | 0.77 (0.67–0.87) | <.001 |
| Outpatient visits |  |  |  |  |  |  |
| Medicare vs Medicaid | 1.99 (1.83–2.17) | <.001 | 1.44 (1.31–1.58) | <.001 | 1.42 (1.29–1.57) | <.001 |
| Other vs Medicaid | 0.94 (0.83–1.07) | NS | 1.00 (0.88–1.14) | NS | 1.01 (0.89–1.15) | NS |
| Emergency department visits |  |  |  |  |  |  |
| Medicare vs Medicaid | 0.73 (0.67–0.80) | <.001 | 0.83 (0.76–0.91) | <.001 | 0.83 (0.75–0.91) | <.001 |
| Other vs Medicaid | 0.60 (0.53–0.68) | <.001 | 0.61 (0.54–0.69) | <.001 | 0.62 (0.55–0.70) | <.001 |

CI, confidence interval; NS, not significant; OR, odds ratio; ORa, adjusted odds ratio.
